# Supplementary material for: Extensive frameshift at all AGG and CCC codons in the mitochondrial cytochrome c oxidase subunit 1 gene of Perkinsus marinus (Alveolata; Dinoflagellata)
Source: PubMed Central journal article supplement — Nucleic Acids Res. 2010 May 27;38(18):6186–94. doi: 10.1093/nar/gkq449 (PMC2952869; doi:10.1093/nar/gkq449), 2010-05-27
Supplement: supp_gkq449_nar-02656-w-2009-File006.pdf [file supp_gkq449_nar-02656-w-2009-File006.pdf]

Supplementary Table S1. Primers used in this study.

| Name                                           | Sequence (5'-3')               |
|------------------------------------------------|--------------------------------|
| PCR and RACE for sequencing                    |                                |
| Pmcox1F1                                       | TTCAACGGTGATGTGGTATTATAAC      |
| Pmcox1R3                                       | CTAAACCTACTGTATATATATGATGAGC   |
| cox1-3f                                        | ACNGGITGRACIYITITAYCCNCCNYT    |
| Pmcox1-5RACE                                   | AAGTGTTGATATAATACTACATCACC     |
| Pmcox1-3RACE                                   | ATGGTGATGTAGGTATTATATCAACAC    |
| Pmcox1fullF                                    | CTAATCAGTAATCGTGATACGCTAACC    |
| Pmcox1fullR                                    | TGAACCAATAGATGATATTAAATTCCATAC |
| Probe amplification for southern hybridization |                                |
| Pmcox1pF                                       | GCCTAGGTTTATATGGTGGTATAACC     |
| Pmcox1pR                                       | CTTCTAGGGGCATTACATTGAAACC      |
| nuLSU-7f                                       | TCCTGAGGGAAACTTCGGAGG          |
| nuLSU-7r                                       | GATAGCAACAAGTACCGTGAGG         |
| PmNumt1F                                       | GTCGAGGCAGCACAGTACTG           |
| PmNumt1R                                       | CGATTCTCGACATCACAGTCACC        |
| PmNumt2F                                       | CCAAGAGACATGCATGAGTAGC         |
| PmNumt2R                                       | GGTGACTGTGATACGACTGCC          |

Supplementary T table S2. Codon usage of *Pmcox1* and *Perkinsus* nuclear genes.

| Codon                                                                                                                                                              | Amino acid | <i>Pmcox1</i> | <i>ispC</i> | <i>sod1</i> | <i>sod2</i> | <i>actin</i> | Codon              | Amino acid | <i>Pmcox1</i> | <i>ispC</i>    | <i>sod1</i> | <i>sod2</i> | <i>actin</i> |
|--------------------------------------------------------------------------------------------------------------------------------------------------------------------|------------|---------------|-------------|-------------|-------------|--------------|--------------------|------------|---------------|----------------|-------------|-------------|--------------|
| UUU                                                                                                                                                                | F          | 14.9          | 5.6         | 4.4         | 7.1         | 0            | UAU                | Y          | 72.5          | 1.9            | 22.1        | 7.1         | 21.3         |
| UUC                                                                                                                                                                |            | 25.6          | 18.6        | 53.1        | 25          | 39.9         | UAC                |            | 10.7          | 14.8           | 17.7        | 32.1        | 13.3         |
| UUA                                                                                                                                                                | L*         | 119.4         | 0           | 4.4         | 0           | 0            | UAA                | Stop       | 0             | 0              | 0           | 0           | 0            |
| UUG                                                                                                                                                                |            | 0             | 9.3         | 31          | 32.1        | 23.9         | UAG                |            | 0             | 0              | 0           | 0           | 0            |
| CUU                                                                                                                                                                | L*         | 0             | 11.1        | 4.4         | 7.1         | 8            | CAU                | H          | 12.8          | 7.4            | 35.4        | 21.4        | 13.3         |
| CUC                                                                                                                                                                |            | 0             | 27.8        | 13.3        | 46.4        | 18.6         | CAC                |            | 4.3           | 9.3            | 8.8         | 10.7        | 10.6         |
| CUA                                                                                                                                                                |            | 0             | 9.3         | 0           | 7.1         | 2.7          | CAA                | Q*         | 8.5           | 9.3            | 13.3        | 0           | 2.7          |
| CUG                                                                                                                                                                |            | 0             | 39          | 13.3        | 28.6        | 13.3         | CAG                |            | 0             | 24.1           | 17.7        | 14.3        | 26.6         |
| AUU                                                                                                                                                                |            | I             | 74.6        | 16.7        | 26.5        | 10.7         | 26.6               |            | AAU           | N              | 70.4        | 7.4         | 17.7         |
| AUC                                                                                                                                                                | 6.4        |               | 37.1        | 22.1        | 17.9        | 42.6         | AAC                | 6.4        | 14.8          |                | 53.1        | 17.9        | 13.3         |
| AUA                                                                                                                                                                | 185.5      |               | 14.8        | 4.4         | 10.7        | 0            | AAA                | K*         | 25.6          | 3.7            | 4.4         | 7.1         | 13.3         |
| AUG                                                                                                                                                                | M          | 23.5          | 29.7        | 17.7        | 25          | 47.9         | AAG                |            | 0             | 44.5           | 53.1        | 28.8        | 47.9         |
| GUU                                                                                                                                                                | V          | 8.5           | 18.6        | 13.3        | 17.9        | 18.6         | GAU                | D*         | 23.5          | 29.7           | 17.7        | 28.6        | 31.9         |
| GUC                                                                                                                                                                |            | 0             | 24.1        | 31          | 17.9        | 29.3         | GAC                |            | 0             | 24.1           | 31          | 25          | 26.6         |
| GUA                                                                                                                                                                |            | 49            | 13          | 13.3        | 7.1         | 5.3          | GAA                | E*         | 10.7          | 16.7           | 0           | 14.3        | 16           |
| GUG                                                                                                                                                                |            | 0             | 16.7        | 4.4         | 21.4        | 16           | GAG                |            | 0             | 27.8           | 48.7        | 28.6        | 58.5         |
| UCU                                                                                                                                                                |            | S             | 25.6        | 13          | 13.3        | 25           | 26.6               |            | UGU           | C <sup>ψ</sup> | 0           | 3.7         | 0            |
| UCC                                                                                                                                                                | 4.3        |               | 9.3         | 0           | 3.6         | 16           | UGC                | 0          | 14.8          |                | 8.8         | 3.6         | 8            |
| UCA                                                                                                                                                                | 23.5       |               | 7.4         | 4.4         | 3.6         | 2.7          | UGA                | Stop/W     | 10.7          | 0              | 0           | 0           | 0            |
| UCG                                                                                                                                                                | 2.1        |               | 20.4        | 4.4         | 21.4        | 2.7          | UGG                | W          | 4.3           | 7.4            | 22.1        | 32.1        | 10.6         |
| CCU                                                                                                                                                                | P          |               | 10.7        | 20.4        | 17.7        | 17.9         | 18.6               | CGU        | R*            | 0              | 9.3         | 8.8         | 10.7         |
| CCC                                                                                                                                                                |            | 0             | 9.3         | 0           | 10.7        | 23.9         | CGC                | 0          |               | 5.6            | 8.8         | 3.6         | 18.6         |
| CCA                                                                                                                                                                |            | 14.9          | 11.1        | 13.3        | 14.3        | 5.3          | CGA                | 0          |               | 9.3            | 0           | 25          | 2.7          |
| CCG                                                                                                                                                                |            | 0             | 11.1        | 17.7        | 10.7        | 2.7          | CGG                | 0          |               | 11.1           | 0           | 21.4        | 0            |
| ACU                                                                                                                                                                |            | T             | 2.1         | 14.8        | 31          | 17.9         | 42.6               | AGU        |               | S              | 21.3        | 14.8        | 17.7         |
| ACC                                                                                                                                                                | 0          |               | 9.3         | 22.1        | 14.3        | 18.6         | AGC                | 0          | 26            |                | 13.3        | 3.6         | 5.3          |
| ACA                                                                                                                                                                | 27.7       |               | 9.3         | 8.8         | 3.6         | 2.7          | AGA                | R*         | 12.8          | 13             | 4.4         | 3.6         | 5.3          |
| ACG                                                                                                                                                                | 0          |               | 11.1        | 4.4         | 10.7        | 10.6         | AGG                |            | 0             | 5.6            | 8.8         | 21.4        | 8            |
| GCU                                                                                                                                                                | A*         |               | 14.9        | 22.3        | 66.4        | 25           | 39.9               |            | GGU           | G              | 64          | 16.7        | 26.5         |
| GCC                                                                                                                                                                |            | 0             | 39          | 17.7        | 17.9        | 23.9         | GGC                | 4.3        | 31.5          |                | 26.5        | 21.4        | 16           |
| GCA                                                                                                                                                                |            | 0             | 27.8        | 8.8         | 28.6        | 2.7          | GGA                | 4.3        | 13            |                | 17.7        | 10.7        | 13.3         |
| GCG                                                                                                                                                                |            | 0             | 31.5        | 8.8         | 10.7        | 0            | GGG                | 0          | 24.1          |                | 0           | 32.1        | 5.3          |
| The numbers represent codon frequencies per thousand. Note that the eight As and two CCs which are hypothetically skipped in translation were manually eliminated. |            |               |             |             |             |              | gene length (bp)   |            | 1410          |                | 1617        | 678         | 840          |
|                                                                                                                                                                    |            |               |             |             |             |              | total codon number |            | 470           | 539            | 226         | 280         | 376          |
| * The amino acid coded only by one codon species in PmCOX1.                                                                                                        |            |               |             |             |             |              | codon kind used    |            | 35            | 60             | 53          | 59          | 56           |
| ψ The amino acid which is not contained in PmCOX1.                                                                                                                 |            |               |             |             |             |              | A+T content        |            | 81%           | 43%            | 50%         | 45%         | 49%          |



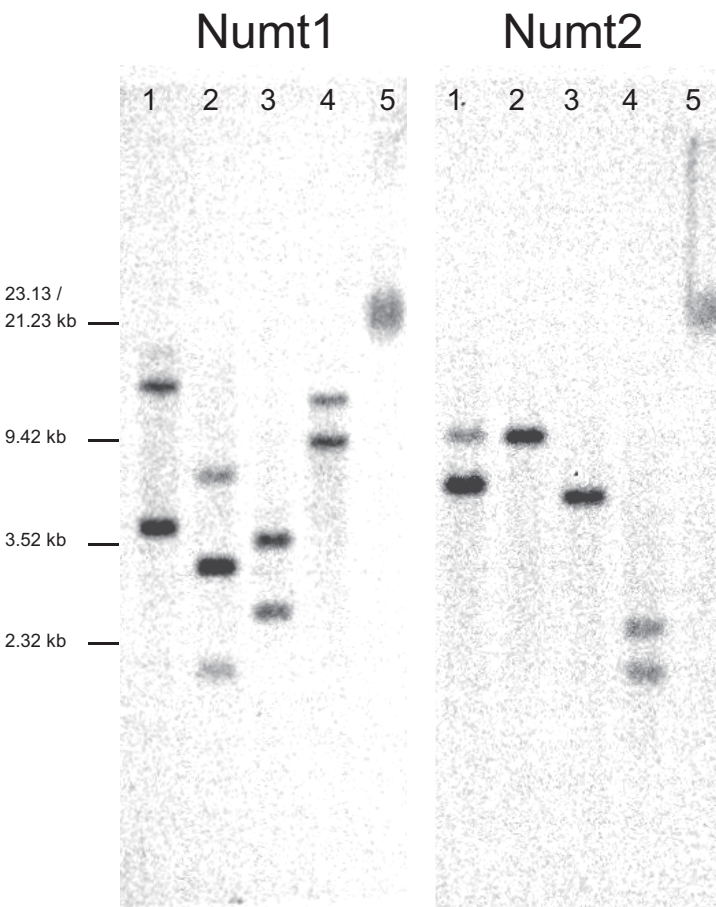

### Supplementary Figure S2.

Southern hybridization images using Numt1 (left) and Numt2 (right) probes. Lanes 1-4, *P. marinus* genomic DNA digested with BamHI (1), HindIII (2), PstI (3), and Sall (4); Lane 5, uncut genomic DNA.



```

*****
Ph AUCAAUUUAGGAACAGUAAUAGUAAAUAUGAUUUUAUUGGUUUAAUAAUUUAUAGGUAAUUAUCAUUAUAAUUCUGCUAUUAAUUUCAUG
Pm AUCAAUUUAGGUACAGUAAUAGUAAAUAUGAUUUUAUUGGUUUAAUAAUUUAUAGGCAUAUCCUCUAUAAUUCUGCUAUUAAUUUCAUG
Po AUCAAUUUAGGUACAGUAAUAGUAAAUAUGAUUUUAUUGGUUUAAUAAUUUAUAGGUAAUUAUCAAAUAAUACAGCUAUUAAUUUUUAG
aa   S I I G U V I V N M I L Y G L I I I G I S S I I S A I N F M

*****

Ph AAUAUUUUUAGUAAUUGAUGGUUAAUUAUUGUAUUUAUUGGAGUAUUUUAUAAACAAGUGUAUUUAAUUUUAUUUCAUUACCAAUA
Pm AAUAUUUUUAGUAAUUGAUGGAAUAAUUAUGUAUUUAUUGGAGUAUUUUAUAAACAAGUGUAUUUAAUUUUAUUUCAUUACCAAUA
Po AAUAUUUUUAGUAAUUGAUGGUUAAUUAUUGUAUUUAUUGGAGUAUUUUAUAAACAAGUGUAUUUAAUUUUAUUUCAUUACCAAUA
aa   N I L I V I D G I I Y V Y I W S I I I T S V L L I I S L P I

*****

Ph UUAUUGGUUAUUUUAUUGAUUUUUCUGAUUAUUAUUUCAUUAUUAAUUGGUGAUGUAGUUAUUUAUCAACAC
Pm UUAUUGGUUAUUUUAUUGAUUUUUCUGAUUAUUAUUUCAUUAUUAAUUGGUGAUGUAGUUAUUUAUCAACAC
Po UUAUUGGUUAUUUUAUUGAUUUUUCUGAUUAUUAUUUCAUUAUUAAUUGGAGAUGUAGUUAUUUAUCAACAC
aa   L N G I L L M I L S D I Y F N S I Y F I L N G D V V L Y Q H

*****

Ph UUAUUCUGAUUUUCGGUCAUCCAGAAGUUUAUUAUUAAUUAUUUACCGUCUUUCGGUAUAAUUCUAUAAUUAUUCUGUAUUAAUAAU
Pm UUAUUCUGAUUUUUGGUCAUCCAGAAGUUUAUUAUUAAUUAUUUACCGUCUUUCGGUAUAAUUCUAUAAUUAUUAUUCUGUAUUAAUAAU
Po UUAUUCUGAUUUUCGGUCAUCCAGAAGUUUAUUAUUAAUUAUUUACCGUCUUUCGGUAUAAUUCUAUAAUUAUUAUUCUGUAUUAAUAAU
aa   L F W Y F G H P E V Y L I L P A F G I I S I I L S V L N N

*****

Ph AAAAUAAUUAUUUGGUUAUGAAUCUAUGAUUUAGCUAUUUUAUUGAUUAUCAUUAUUAGGUAGUAUAGUAUGG
Pm AAAAUAAUUAUUUGGUUAUGAAUCUAUGAUUUAGCUAUUUUAUUGAUUAUCAUUAUUAGGUAGUAUAGUAUGA
Po AAAAUAAUUAUUUGGUUAUGAAUCUAUGAUUUAGCUAUUUUAUUGAUUAUCAUUAUUAGGUAGUAUAGUAUGA
aa   K I I F G M K S M I L A I I M I S I L G S I V W

```

## Supplementary Figure S4.

Alignment of partial *Pmcox1* mRNA (Pm) and its orthologous sequences obtained from *P. olseni* (Po) and *P. honshuensis* (Ph), and their corresponding amino acid sequence deduced based on the frameshift model. Asterisks show the conserved residues. The UAGGY motifs which seem to be involved in frameshift are written in black background.

A.

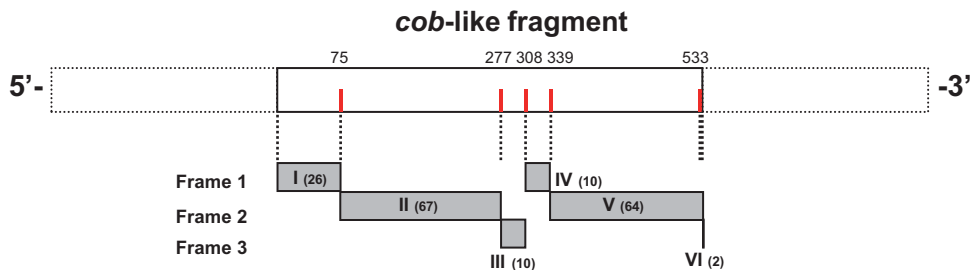

B.

The end of  
each block

```

70  UAU UAU AGG UUA UAU A.....UAA
    Y  Y  R  L  Y  ... ( 5 a.a.)... *
272 UAU UGG AGG UAU AAC A.....UAG
    Y  W  R  Y  N  ... ( 7 a.a.)... *
303 AUA UCU AGG CAU ACC A.....UAG
    I  S  R  H  T  ... ( 7 a.a.)... *
334 AUA UCU AGG UAA UUA U
    I  S  R  *  F
528 AAU AAU AGG UAU AA (3' end of contig)
    N  N  R  Y
  
```

C.

```

70  UAU UAU A GGU UAU AUA
    Y  Y  G  Y  I
272 UAU UGG A GGU AUA ACA
    Y  W  G  I  T
303 AUA UCU A GGC AUA CCA
    I  S  G  I  P
334 AUA UCU A GGU AAU UAU
    I  S  G  N  Y
528 AAU AAU A GGU AUA A
    N  N  G  I
  
```

## Supplementary Figure S5.

A, COB-like blocks dispersed in three reading frames of *P. marinus* cob-like fragment found in the database; B, translation with standard codon table; C, translation with the frameshift at in-frame AGG. Detail descriptions are found in the legend of Figure 3. Note that U of the UAGGY motif is substituted by G in block II.
